# Supplementary material for: rs10732516 polymorphism at the IGF2/H19 locus associates with genotype-specific effects on placental DNA methylation and birth weight of newborns conceived by assisted reproductive technology
Source: Springer Nature journal article supplement (doi:10.1186/s13148-018-0511-2), 2018-06-18
Supplement: MOESM1 [file 13148_2018_511_MOESM1_ESM.pdf]

Additional file 1: Table S1.

| Genotype  | FRESH/FET | Conception | Gender | Weight (g) | Weight SD | Length (cm) | Length SD | Head circumference (cm) | Head circumference SD | Placenta (g) | Gestational weeks.days | Apgar 5 min | Country |
|-----------|-----------|------------|--------|------------|-----------|-------------|-----------|-------------------------|-----------------------|--------------|------------------------|-------------|---------|
| G/G       | FRESH     | IVF        | Male   | 3700       | 0,3       | 51          | -0,1      | 35,5                    | 0,3                   | 800          | 40,0                   | 10          | FI      |
| G/G       | FRESH     | IVF        | Female | 3100       | -0,3      | 50          | 0,2       | 33,5                    | -0,5                  | 556          | 39,0                   | 9           | FI      |
| G/G       | FRESH     | IVF        | Female | 2735       | -1,0      | 46          | -1,4      | 34                      | 0,0                   | 455          | 38,5                   | 10          | FI      |
| G/G       | FRESH     | IVF        | Female | 3810       | 0,8       | 52          | 0,7       | 35,8                    | 0,9                   | 695          | 39,6                   | 10          | FI      |
| G/G       | FRESH     | IVF        | Female | 4015       | 1,2       | 52          | 0,7       | 37                      | 1,7                   | 665          | 39,6                   | 9           | FI      |
| G/G       | FRESH     | IVF        | Male   | 3786       | -0,2      | 52,0        | -0,2      | 36,0                    | 0,2                   | 477          | 41,3                   | 9           | EE      |
| G/G       | FRESH     | IVF        | Male   | 4084       | 1,4       | 51,0        | 0,2       | 38,0                    | 2,3                   | 485          | 39,2                   | 9           | EE      |
| G/G       | FRESH     | IVF        | Male   | 4660       | 2,3       | 54,0        | 1,4       | 40,0                    | 3,6                   | ND           | 39,5                   | 9           | EE      |
| G/G       | FRESH     | IVF        | Male   | 3640       | 0,8       | 50,0        | 0,1       | 34,5                    | 0,2                   | 421          | 38,4                   | 9           | EE      |
| G/G       | FRESH     | IVF        | Female | 3444       | 0,2       | 50,0        | 0,0       | 35,0                    | 0,4                   | 399          | 39,4                   | 9           | EE      |
| G/G       | FRESH     | IVF        | Male   | 4074       | 1,4       | 52,0        | 0,7       | 36,0                    | 1,0                   | 526          | 39,1                   | 9           | EE      |
| G/G       | FRESH     | IVF        | Male   | 3888       | 1,1       | 51,0        | 0,3       | 36,0                    | 1,0                   | 479          | 39,1                   | 8           | EE      |
| G/G       | FRESH     | ICSI       | Male   | 4088       | 0,7       | 52,0        | 0,1       | 36,0                    | 0,4                   | 558          | 40,5                   | 9           | EE      |
| G/G       | FRESH     | ICSI       | Male   | 2962       | -0,3      | 48,0        | -0,4      | 34,5                    | 0,5                   | 443          | 37,5                   | 9           | EE      |
| G/G       | FRESH     | ICSI       | Female | 4074       | 1,4       | 52,0        | 0,8       | 38,5                    | 2,6                   | 542          | 39,4                   | 8           | EE      |
| G/G       | FRESH     | ICSI       | Male   | 3906       | 0,5       | 52,0        | 0,2       | 36,5                    | 0,9                   | 490          | 40,3                   | 9           | EE      |
| G/G       | FET       | IVF        | Female | 3340       | 0,5       | 51          | 0,9       | 36                      | 1,6                   | 700          | 38,1                   | 10          | FI      |
| G/G       | FET       | IVF        | Male   | 3744       | -0,3      | 53          | 0,3       | 36,5                    | 0,5                   | 545          | 41,3                   | 9           | FI      |
| G/G       | FET       | IVF        | Male   | 3600       | -0,2      | 50          | -0,8      | 36                      | 0,5                   | 575          | 40,4                   | 10          | FI      |
| G/G       | FET       | IVF        | Female | 3470       | 0,2       | 49          | -0,6      | 34                      | -0,5                  | 590          | 39,6                   | 9           | FI      |
| G/G       | FET       | IVF        | Female | 3930       | 0,7       | 48          | -1,4      | 34                      | -0,8                  | 618          | 40,5                   | 10          | FI      |
| G/G       | FET       | IVF        | Female | 4786       | 1,9       | 54,0        | 1,1       | 35,0                    | -0,3                  | 775          | 41,3                   | 9           | EE      |
| G/G       | FET       | ICSI       | Male   | 2163       | -0,7      | 45,0        | -0,3      | 31,0                    | -0,5                  | 316          | 34,6                   | 9           | EE      |
| patG/matA | FRESH     | IVF        | Male   | 2970       | -0,9      | 49          | -0,5      | 33,5                    | -0,7                  | 465          | 39,0                   | 9           | FI      |
| patG/matA | FRESH     | IVF        | Female | 3240       | -0,5      | 50          | -0,4      | 36                      | 0,8                   | 520          | 40,3                   | 10          | FI      |
| patG/matA | FRESH     | IVF        | Female | 4350       | 1,0       | 53          | 0,4       | 34,5                    | -0,9                  | 625          | 42,0                   | 9           | FI      |
| patG/matA | FRESH     | IVF        | Female | 3500       | -0,1      | 51          | 0,0       | 34                      | -0,8                  | 677          | 40,5                   | 9           | FI      |
| patG/matA | FRESH     | IVF        | Female | 3724       | 0,5       | 52,0        | 0,5       | 35,5                    | 0,4                   | 512          | 40,3                   | 10          | EE      |
| patG/matA | FRESH     | IVF        | Female | 3278       | 0,9       | 50,0        | 1,0       | 36,0                    | 2,1                   | 411          | 37,0                   | 9           | EE      |
| patG/matA | FRESH     | IVF        | Male   | 2858       | -0,9      | 50,0        | 0,1       | 34,0                    | -0,1                  | 440          | 38,3                   | 9           | EE      |
| patG/matA | FRESH     | IVF        | Female | 3790       | 0,4       | 51,0        | -0,1      | 35,0                    | -0,1                  | 525          | 40,6                   | 9           | EE      |
| patG/matA | FRESH     | IVF        | Male   | 3662       | 0,5       | 50,0        | -0,2      | 38,0                    | 2,3                   | 436          | 39,2                   | 9           | EE      |
| patG/matA | FRESH     | IVF        | Male   | 3314       | -0,2      | 47,0        | -1,5      | 35,0                    | 0,3                   | 342          | 39,1                   | 9           | EE      |
| patG/matA | FRESH     | ICSI       | Male   | 4038       | 2,1       | 51          | 0,9       | 35,5                    | 1,2                   | 670          | 37,4                   | 9           | FI      |
| patG/matA | FRESH     | ICSI       | Female | 3049       | 0,0       | 49          | 0,2       | 34                      | 0,3                   | 542          | 38,0                   | 9           | FI      |
| patG/matA | FRESH     | ICSI       | Male   | 3988       | 0,7       | 52,0        | 0,2       | 36,5                    | 0,9                   | 453          | 40,3                   | 9           | EE      |
| patG/matA | FRESH     | ICSI       | Female | 3528       | 0,4       | 50,0        | 0,0       | 34,0                    | -0,3                  | 359          | 39,3                   | 10          | EE      |
| patG/matA | FET       | IVF        | Male   | 3935       | 0,4       | 51          | -0,4      | 37                      | 1,1                   | 678          | 40,6                   | 9           | FI      |
| patG/matA | FET       | IVF        | Female | 2968       | 0,3       | 48,0        | 0,2       | 34,5                    | 1,1                   | 415          | 37,0                   | 8           | EE      |
| patG/matA | FET       | ICSI       | Male   | 3670       | 0,7       | 51          | 0,3       | 39                      | 3,1                   | 600          | 39,0                   | 9           | FI      |
| patG/matA | FET       | ICSI       | Female | 3880       | 0,1       | 54,0        | 0,8       | 37,5                    | 1,3                   | 590          | 42,1                   | 9           | EE      |
| patA/matG | FRESH     | IVF        | Female | 2640       | -1,8      | 48          | -1,1      | 35                      | 0,2                   | 500          | 40,1                   | 8           | FI      |
| patA/matG | FRESH     | IVF        | Male   | 3874       | 0,5       | 52          | 0,3       | 36                      | 0,6                   | 505          | 40,2                   | 9           | FI      |
| patA/matG | FRESH     | IVF        | Female | 3975       | 0,3       | 50          | -1,0      | 37                      | 1,0                   | 750          | 42,0                   | 9           | FI      |
| patA/matG | FRESH     | IVF        | Female | 3050       | -0,7      | 49          | -0,5      | 33,5                    | -1,1                  | 443          | 39,5                   | 9           | FI      |
| patA/matG | FRESH     | IVF        | Male   | 1586       | -2,0      | 41,5        | -1,7      | 29,5                    | -1,5                  | 161          | 34,5                   | 7           | EE      |
| patA/matG | FRESH     | IVF        | Male   | 3494       | 0,3       | 51,0        | 0,3       | 36,0                    | 1,0                   | 494          | 39,0                   | 10          | EE      |
| patA/matG | FRESH     | ICSI       | Male   | 3720       | 0,3       | 52          | 0,3       | 36                      | 0,6                   | 640          | 40,1                   | 9           | FI      |
| patA/matG | FRESH     | ICSI       | Male   | 3365       | -0,9      | 51          | -0,5      | 35,5                    | 0,0                   | 435          | 41,0                   | 9           | FI      |
| patA/matG | FRESH     | ICSI       | Male   | 3624       | 0,4       | 48          | -1,1      | 36,5                    | 1,3                   | 630          | 39,2                   | 9           | FI      |
| patA/matG | FRESH     | ICSI       | Male   | 3680       | -0,2      | 52,0        | 0,0       | 36,5                    | 0,7                   | 500          | 40,6                   | 9           | EE      |
| patA/matG | FRESH     | ICSI       | Female | 3848       | 0,9       | 50,0        | -0,1      | 35,0                    | 0,3                   | 411          | 39,5                   | 9           | EE      |
| patA/matG | FRESH     | ICSI       | Female | 3592       | 0,2       | 50,0        | -0,4      | 35,0                    | 0,0                   | 523          | 40,4                   | 9           | EE      |
| patA/matG | FRESH     | ICSI       | Male   | 4326       | 2,1       | 54,0        | 1,7       | 36,5                    | 1,4                   | 618          | 38,6                   | 8           | EE      |
| patA/matG | FET       | IVF        | Male   | 3320       | -0,5      | 50          | -0,5      | 34,5                    | -0,3                  | 695          | 39,6                   | 9           | FI      |
| patA/matG | FET       | IVF        | Male   | 4180       | 1,5       | 52          | 0,5       | 37                      | 1,5                   | 830          | 39,4                   | 9           | FI      |
| patA/matG | FET       | IVF        | Male   | 4085       | 0,2       | 51          | -0,8      | 35                      | -0,7                  | 747          | 41,6                   | 10          | FI      |
| patA/matG | FET       | IVF        | Male   | 3818       | 0,8       | 52,0        | 0,7       | 35,5                    | 0,6                   | 476          | 39,2                   | 10          | EE      |

| Genotype | FRESH/FET | Conception | Gender | Weight (g) | Weight SD | Length (cm) | Length SD | Head circumference (cm) | Head circumference SD | Placenta (g) | Gestational weeks.days | Apgar 5 min | Country |
|----------|-----------|------------|--------|------------|-----------|-------------|-----------|-------------------------|-----------------------|--------------|------------------------|-------------|---------|
| A/A      | FRESH     | IVF        | Male   | 2970       | -1,1      | 47          | -1,6      | 33                      | -1,2                  | 455          | 39.3                   | 9           | FI      |
| A/A      | FRESH     | IVF        | Female | 3645       | 0,0       | 49          | -1,2      | 33                      | -1,7                  | 700          | 41.2                   | 9           | FI      |
| A/A      | FRESH     | IVF        | Male   | 3865       | 0,0       | 51          | -0,6      | 36                      | 0,2                   | 650          | 41.2                   | 10          | FI      |
| A/A      | FRESH     | IVF        | Female | 2194       | -1,4      | 44          | -1,3      | 32                      | -0,5                  | 495          | 36.5                   | 9           | FI      |
| A/A      | FRESH     | IVF        | Male   | 3550       | -0,9      | 51          | -0,8      | 36                      | 0,0                   | 450          | 41.6                   | 10          | FI      |
| A/A      | FRESH     | IVF        | Male   | 3420       | -1,2      | 52          | -0,4      | 33                      | -2,2                  | 510          | 41.6                   | 10          | FI      |
| A/A      | FRESH     | IVF        | Male   | 4080       | 1,3       | 53          | 1,0       | 34                      | -0,6                  | 720          | 39.4                   | 10          | FI      |
| A/A      | FRESH     | IVF        | Female | 3144       | -0,8      | 51          | 0,0       | 34,5                    | -0,4                  | 600          | 40.4                   | 9           | FI      |
| A/A      | FRESH     | IVF        | Female | 3875       | 0,7       | 52          | 0,5       | 35                      | 0,0                   | 630          | 40.4                   | 9           | FI      |
| A/A      | FRESH     | IVF        | Female | 3420       | -0,3      | 52          | 0,4       | 36                      | 0,7                   | 490          | 40.6                   | 9           | FI      |
| A/A      | FRESH     | IVF        | Male   | 2968       | -0,8      | 51,0        | 0,5       | 33,5                    | -0,6                  | 362          | 38.5                   | 10          | EE      |
| A/A      | FRESH     | IVF        | Male   | 3134       | -0,4      | 50,0        | -0,1      | 35,0                    | 0,4                   | 334          | 38.6                   | 8           | EE      |
| A/A      | FRESH     | IVF        | Female | 3520       | -0,3      | 50,0        | -0,7      | 36,0                    | 0,5                   | 357          | 41.2                   | 9           | EE      |
| A/A      | FRESH     | IVF        | Female | 3150       | -0,2      | 49,5        | 0,0       | 34,0                    | -0,1                  | 443          | 39.0                   | 10          | EE      |
| A/A      | FRESH     | IVF        | Male   | 3366       | -1,0      | 50,0        | -1,0      | 34,0                    | -1,2                  | 427          | 41.1                   | 9           | EE      |
| A/A      | FRESH     | IVF        | Male   | 2782       | -1,0      | 50,0        | 0,1       | 35,5                    | 0,9                   | 364          | 38.3                   | 8           | EE      |
| A/A      | FRESH     | ICSI       | Female | 2942       | -1,0      | 45          | -2,3      | 31                      | -2,6                  | 500          | 39.6                   | 10          | FI      |
| A/A      | FRESH     | ICSI       | Male   | 3914       | 1,6       | 52,0        | 1,1       | 36,0                    | 1,4                   | 571          | 38.1                   | 8           | EE      |
| A/A      | FRESH     | ICSI       | Female | 4552       | 1,9       | 53,0        | 1,0       | 35,5                    | 0,5                   | 689          | 40.2                   | 8           | EE      |
| A/A      | FET       | IVF        | Male   | 3900       | 1,0       | 53          | 1,0       | 38                      | 2,3                   | 745          | 39.3                   | 9           | FI      |
| A/A      | FET       | IVF        | Male   | 4095       | 1,3       | 52          | 0,5       | 35                      | 0,1                   | 850          | 39.4                   | 9           | FI      |
| A/A      | FET       | IVF        | Female | 3818       | 0,0       | 50          | -1,0      | 33,5                    | -1,7                  | 656          | 42.1                   | 9           | FI      |
| A/A      | FET       | ICSI       | Male   | 3905       | 0,1       | 51          | -0,6      | 36,5                    | 0,6                   | 440          | 41.2                   | 10          | FI      |
| A/A      | FET       | ICSI       | Male   | 4610       | 2,3       | 54          | 1,4       | 37                      | 1,5                   | 950          | 39.4                   | 10          | FI      |
| A/A      | FET       | ICSI       | Male   | 3910       | 0,7       | 52          | 0,4       | 34,5                    | -0,4                  | 600          | 40.0                   | 10          | FI      |
| A/A      | FET       | ICSI       | Female | 4822       | 2,6       | 53          | 1,3       | 36,6                    | 1,6                   | 1140         | 39.3                   | 9           | FI      |
| A/A      | FET       | ICSI       | Female | 2900       | -1,1      | 48          | -1,0      | 31                      | -2,6                  | 415          | 39.6                   | 10          | FI      |
| A/A      | FET       | ICSI       | Female | 4464       | 1,2       | 54,0        | 0,9       | 36,0                    | 0,3                   | 455          | 41.6                   | 10          | EE      |
