# Supplementary material for: rs10732516 polymorphism at the IGF2/H19 locus associates with genotype-specific effects on placental DNA methylation and birth weight of newborns conceived by assisted reproductive technology
Source: Springer Nature journal article supplement (doi:10.1186/s13148-018-0511-2), 2018-06-18
Supplement: MOESM2 [file 13148_2018_511_MOESM2_ESM.pdf]

Additional file 2: Table S1

| <b>H19 ICR CTCF6: methylation level mean with <math>\pm</math> SD</b> |        |         |                      |                      |                      |                      |                      |                      |                      |                      |                      |
|-----------------------------------------------------------------------|--------|---------|----------------------|----------------------|----------------------|----------------------|----------------------|----------------------|----------------------|----------------------|----------------------|
|                                                                       |        |         | CpG_1                | CpG_5,6,7,8          | CpG_10               | CpG_11,12            | CpG_13,14            | CpG_21,22            | CpG_23               |                      |                      |
| TOTAL                                                                 | N = 60 | Control | 0.34 $\pm$ 0.03 N=59 | 0.28 $\pm$ 0.04 N=60 |                      | 0.32 $\pm$ 0.03 N=60 | 0.32 $\pm$ 0.03 N=60 | 0.52 $\pm$ 0.06 N=60 | 0.63 $\pm$ 0.08 N=60 |                      |                      |
|                                                                       | N = 62 | ART     | 0.35 $\pm$ 0.04 N=61 | 0.29 $\pm$ 0.04 N=61 |                      | 0.33 $\pm$ 0.03 N=61 | 0.33 $\pm$ 0.03 N=61 | 0.53 $\pm$ 0.07 N=61 | 0.64 $\pm$ 0.08 N=61 |                      |                      |
| G/G                                                                   | N = 15 | Control | 0.31 $\pm$ 0.02 N=15 | 0.32 $\pm$ 0.04 N=15 | 0.36 $\pm$ 0.02 N=15 | 0.31 $\pm$ 0.02 N=15 | 0.32 $\pm$ 0.02 N=15 | 0.46 $\pm$ 0.03 N=15 | 0.56 $\pm$ 0.04 N=15 |                      |                      |
|                                                                       | N = 18 | ART     | 0.32 $\pm$ 0.04 N=18 | 0.31 $\pm$ 0.03 N=18 | 0.37 $\pm$ 0.03 N=18 | 0.32 $\pm$ 0.03 N=18 | 0.32 $\pm$ 0.02 N=18 | 0.47 $\pm$ 0.05 N=18 | 0.57 $\pm$ 0.05 N=18 |                      |                      |
| patG/matA                                                             | N = 15 | Control | 0.34 $\pm$ 0.02 N=14 | 0.30 $\pm$ 0.03 N=15 | 0.82 $\pm$ 0.03 N=15 | 0.32 $\pm$ 0.01 N=15 | 0.31 $\pm$ 0.01 N=15 | 0.58 $\pm$ 0.02 N=15 | 0.70 $\pm$ 0.03 N=15 |                      |                      |
|                                                                       | N = 15 | ART     | 0.36 $\pm$ 0.04 N=15 | 0.31 $\pm$ 0.04 N=15 | 0.82 $\pm$ 0.03 N=15 | 0.34 $\pm$ 0.04 N=15 | 0.33 $\pm$ 0.04 N=15 | 0.59 $\pm$ 0.04 N=15 | 0.70 $\pm$ 0.05 N=15 |                      |                      |
| patA/matG                                                             | N = 15 | Control | 0.32 $\pm$ 0.02 N=15 | 0.26 $\pm$ 0.02 N=15 |                      | 0.33 $\pm$ 0.02 N=15 | 0.33 $\pm$ 0.03 N=15 | 0.48 $\pm$ 0.03 N=15 | 0.57 $\pm$ 0.04 N=15 |                      |                      |
|                                                                       | N = 14 | ART     | 0.36 $\pm$ 0.03 N=14 | 0.25 $\pm$ 0.02 N=14 |                      | 0.34 $\pm$ 0.03 N=14 | 0.33 $\pm$ 0.02 N=14 | 0.49 $\pm$ 0.03 N=14 | 0.57 $\pm$ 0.04 N=14 |                      |                      |
| A/A                                                                   | N = 15 | Control | 0.35 $\pm$ 0.04 N=15 | 0.23 $\pm$ 0.04 N=15 |                      | 0.33 $\pm$ 0.05 N=15 | 0.33 $\pm$ 0.04 N=15 | 0.57 $\pm$ 0.05 N=15 | 0.70 $\pm$ 0.07 N=15 |                      |                      |
|                                                                       | N = 15 | ART     | 0.33 $\pm$ 0.02 N=14 | 0.26 $\pm$ 0.03 N=14 |                      | 0.34 $\pm$ 0.03 N=14 | 0.33 $\pm$ 0.03 N=14 | 0.59 $\pm$ 0.02 N=14 | 0.71 $\pm$ 0.04 N=14 |                      |                      |
| <b>H19 DMR: methylation level mean with <math>\pm</math> SD</b>       |        |         |                      |                      |                      |                      |                      |                      |                      |                      |                      |
|                                                                       |        |         | CpG_3                | CpG_6                | CpG_7,8              | CpG_9                | CpG_10               | CpG_14               | CpG_16               | CpG_17,18            | CpG_20               |
| TOTAL                                                                 | N = 58 | Control | 0.33 $\pm$ 0.02 N=58 | 0.26 $\pm$ 0.04 N=58 | 0.27 $\pm$ 0.03 N=58 | 0.32 $\pm$ 0.02 N=58 | 0.34 $\pm$ 0.04 N=58 | 0.31 $\pm$ 0.04 N=58 | 0.31 $\pm$ 0.04 N=58 | 0.27 $\pm$ 0.05 N=58 | 0.29 $\pm$ 0.05 N=58 |
|                                                                       | N = 57 | ART     | 0.34 $\pm$ 0.02 N=56 | 0.27 $\pm$ 0.04 N=56 | 0.28 $\pm$ 0.03 N=56 | 0.32 $\pm$ 0.02 N=57 | 0.35 $\pm$ 0.04 N=54 | 0.33 $\pm$ 0.07 N=57 | 0.33 $\pm$ 0.04 N=57 | 0.28 $\pm$ 0.04 N=57 | 0.29 $\pm$ 0.06 N=57 |
| G/G                                                                   | N = 15 | Control | 0.32 $\pm$ 0.02 N=13 | 0.26 $\pm$ 0.03 N=13 | 0.27 $\pm$ 0.03 N=13 | 0.32 $\pm$ 0.02 N=13 | 0.35 $\pm$ 0.03 N=13 | 0.31 $\pm$ 0.04 N=13 | 0.32 $\pm$ 0.03 N=13 | 0.28 $\pm$ 0.04 N=13 | 0.30 $\pm$ 0.04 N=13 |
|                                                                       | N = 18 | ART     | 0.34 $\pm$ 0.02 N=18 | 0.27 $\pm$ 0.03 N=18 | 0.28 $\pm$ 0.03 N=18 | 0.32 $\pm$ 0.02 N=18 | 0.35 $\pm$ 0.03 N=15 | 0.33 $\pm$ 0.06 N=18 | 0.33 $\pm$ 0.03 N=18 | 0.28 $\pm$ 0.03 N=18 | 0.29 $\pm$ 0.05 N=18 |
| patG/matA                                                             | N = 15 | Control | 0.34 $\pm$ 0.01 N=15 | 0.26 $\pm$ 0.03 N=15 | 0.28 $\pm$ 0.03 N=15 | 0.32 $\pm$ 0.02 N=15 | 0.36 $\pm$ 0.43 N=15 | 0.32 $\pm$ 0.04 N=15 | 0.33 $\pm$ 0.03 N=15 | 0.29 $\pm$ 0.04 N=15 | 0.30 $\pm$ 0.04 N=15 |
|                                                                       | N = 15 | ART     | 0.35 $\pm$ 0.02 N=12 | 0.26 $\pm$ 0.03 N=12 | 0.27 $\pm$ 0.03 N=12 | 0.33 $\pm$ 0.03 N=13 | 0.34 $\pm$ 0.04 N=13 | 0.34 $\pm$ 0.04 N=13 | 0.32 $\pm$ 0.04 N=13 | 0.27 $\pm$ 0.05 N=13 | 0.28 $\pm$ 0.06 N=13 |
| patA/matG                                                             | N = 15 | Control | 0.33 $\pm$ 0.02 N=15 | 0.26 $\pm$ 0.05 N=15 | 0.26 $\pm$ 0.04 N=15 | 0.31 $\pm$ 0.02 N=15 | 0.34 $\pm$ 0.04 N=15 | 0.30 $\pm$ 0.04 N=15 | 0.31 $\pm$ 0.05 N=15 | 0.26 $\pm$ 0.07 N=15 | 0.28 $\pm$ 0.06 N=15 |
|                                                                       | N = 12 | ART     | 0.34 $\pm$ 0.02 N=12 | 0.27 $\pm$ 0.04 N=12 | 0.28 $\pm$ 0.03 N=12 | 0.33 $\pm$ 0.02 N=12 | 0.34 $\pm$ 0.03 N=12 | 0.34 $\pm$ 0.11 N=12 | 0.33 $\pm$ 0.05 N=12 | 0.28 $\pm$ 0.06 N=12 | 0.29 $\pm$ 0.06 N=12 |
| A/A                                                                   | N = 15 | Control | 0.33 $\pm$ 0.02 N=15 | 0.25 $\pm$ 0.04 N=15 | 0.26 $\pm$ 0.03 N=15 | 0.31 $\pm$ 0.03 N=15 | 0.33 $\pm$ 0.04 N=15 | 0.29 $\pm$ 0.04 N=15 | 0.30 $\pm$ 0.03 N=15 | 0.26 $\pm$ 0.03 N=15 | 0.27 $\pm$ 0.04 N=15 |
|                                                                       | N = 15 | ART     | 0.35 $\pm$ 0.02 N=14 | 0.27 $\pm$ 0.04 N=14 | 0.28 $\pm$ 0.03 N=14 | 0.34 $\pm$ 0.03 N=14 | 0.35 $\pm$ 0.05 N=14 | 0.30 $\pm$ 0.04 N=14 | 0.33 $\pm$ 0.05 N=14 | 0.28 $\pm$ 0.05 N=14 | 0.29 $\pm$ 0.07 N=14 |
| <b>L1NE-1: methylation level mean with <math>\pm</math> SD</b>        |        |         |                      |                      |                      |                      |                      |                      |                      |                      |                      |
|                                                                       |        |         | CpG_1                | CpG_2                | CpG_3                | CpG_5                | CpG_6,7              | CpG_8,9              | CpG_11,12            |                      |                      |
| TOTAL                                                                 | N = 16 | Control | 0.23 $\pm$ 0.03 N=16 | 0.24 $\pm$ 0.01 N=16 | 0.30 $\pm$ 0.02 N=16 | 0.04 $\pm$ 0.02 N=16 | 0.19 $\pm$ 0.06 N=16 | 0.19 $\pm$ 0.04 N=16 | 0.32 $\pm$ 0.03 N=16 |                      |                      |
|                                                                       | N = 16 | ART     | 0.23 $\pm$ 0.03 N=16 | 0.23 $\pm$ 0.02 N=16 | 0.30 $\pm$ 0.02 N=16 | 0.04 $\pm$ 0.01 N=16 | 0.22 $\pm$ 0.04 N=16 | 0.20 $\pm$ 0.02 N=16 | 0.31 $\pm$ 0.02 N=16 |                      |                      |

# Additional file 2: Table S2

## Total methylation levels in placenta

| Total          | N  | N of clones | CpG_1         | CpG_2         | CpG_3         | CpG_4         | CpG_5         | CpG_6         | CpG_7         | CpG_8         | CpG_9         | CpG_10*       | CpG_11        | CpG_12        | CpG_13        | CpG_14        | CpG_15        | CpG_16        | CpG_17        | CpG_18        | CpG_19        | CpG_20        | CpG_21        | CpG_22        | CpG_23        | CpG_24        | CpG_25        | CpG_26        | CpG_27        |               |
|----------------|----|-------------|---------------|---------------|---------------|---------------|---------------|---------------|---------------|---------------|---------------|---------------|---------------|---------------|---------------|---------------|---------------|---------------|---------------|---------------|---------------|---------------|---------------|---------------|---------------|---------------|---------------|---------------|---------------|---------------|
| <b>Control</b> | 12 | 535         | 0,51<br>±0,07 | 0,51<br>±0,06 | 0,51<br>±0,06 | 0,49<br>±0,06 | 0,51<br>±0,04 | 0,48<br>±0,09 | 0,51<br>±0,05 | 0,50<br>±0,05 | 0,49<br>±0,07 | 0,25<br>±0,24 | 0,50<br>±0,05 | 0,51<br>±0,04 | 0,51<br>±0,03 | 0,51<br>±0,04 | 0,51<br>±0,05 | 0,48<br>±0,06 | 0,50<br>±0,04 | 0,48<br>±0,04 | 0,50<br>±0,04 | 0,51<br>±0,05 | 0,50<br>±0,04 | 0,48<br>±0,06 | 0,47<br>±0,04 | 0,54<br>±0,06 | 0,70<br>±0,11 | 0,68<br>±0,08 | 0,63<br>±0,06 |               |
| <b>ART</b>     | 14 | 680         | 0,45<br>±0,08 | 0,46<br>±0,07 | 0,41<br>±0,08 | 0,45<br>±0,06 | 0,46<br>±0,06 | 0,44<br>±0,08 | 0,47<br>±0,04 | 0,48<br>±0,06 | 0,47<br>±0,07 | 0,24<br>±0,23 | 0,48<br>±0,04 | 0,47<br>±0,03 | 0,48<br>±0,04 | 0,47<br>±0,04 | 0,47<br>±0,06 | 0,45<br>±0,03 | 0,48<br>±0,05 | 0,48<br>±0,05 | 0,48<br>±0,04 | 0,48<br>±0,05 | 0,45<br>±0,08 | 0,47<br>±0,03 | 0,44<br>±0,05 | 0,42<br>±0,07 | 0,50<br>±0,09 | 0,70<br>±0,12 | 0,67<br>±0,07 | 0,59<br>±0,06 |

## Genotype-specific methylation levels in placenta

### patG/matA

| Total          | N | N of clones | CpG_1         | CpG_2         | CpG_3         | CpG_4         | CpG_5         | CpG_6         | CpG_7         | CpG_8         | CpG_9         | CpG_10*       | CpG_11        | CpG_12        | CpG_13        | CpG_14        | CpG_15        | CpG_16        | CpG_17        | CpG_18        | CpG_19        | CpG_20        | CpG_21        | CpG_22        | CpG_23        | CpG_24        | CpG_25        | CpG_26        | CpG_27        |
|----------------|---|-------------|---------------|---------------|---------------|---------------|---------------|---------------|---------------|---------------|---------------|---------------|---------------|---------------|---------------|---------------|---------------|---------------|---------------|---------------|---------------|---------------|---------------|---------------|---------------|---------------|---------------|---------------|---------------|
| <b>Control</b> | 6 | 285         | 0,50<br>±0,05 | 0,52<br>±0,06 | 0,50<br>±0,06 | 0,49<br>±0,05 | 0,50<br>±0,03 | 0,49<br>±0,04 | 0,50<br>±0,02 | 0,51<br>±0,02 | 0,47<br>±0,03 | 0,48<br>±0,02 | 0,50<br>±0,01 | 0,49<br>±0,02 | 0,51<br>±0,03 | 0,50<br>±0,03 | 0,50<br>±0,03 | 0,47<br>±0,02 | 0,50<br>±0,03 | 0,48<br>±0,02 | 0,49<br>±0,03 | 0,50<br>±0,02 | 0,49<br>±0,02 | 0,47<br>±0,03 | 0,47<br>±0,04 | 0,55<br>±0,08 | 0,78<br>±0,08 | 0,75<br>±0,02 | 0,65<br>±0,06 |
| <b>ART</b>     | 6 | 274         | 0,50<br>±0,09 | 0,49<br>±0,07 | 0,46<br>±0,06 | 0,49<br>±0,04 | 0,50<br>±0,05 | 0,48<br>±0,05 | 0,47<br>±0,03 | 0,49<br>±0,03 | 0,47<br>±0,07 | 0,46<br>±0,03 | 0,48<br>±0,03 | 0,47<br>±0,03 | 0,49<br>±0,03 | 0,48<br>±0,03 | 0,48<br>±0,03 | 0,45<br>±0,02 | 0,49<br>±0,02 | 0,49<br>±0,04 | 0,49<br>±0,02 | 0,46<br>±0,04 | 0,47<br>±0,03 | 0,45<br>±0,04 | 0,43<br>±0,03 | 0,57<br>±0,06 | 0,79<br>±0,07 | 0,69<br>±0,05 | 0,60<br>±0,09 |

### patA/matG

| Total          | N | N of clones | CpG_1         | CpG_2         | CpG_3         | CpG_4         | CpG_5         | CpG_6         | CpG_7         | CpG_8         | CpG_9         | CpG_10*       | CpG_11        | CpG_12        | CpG_13        | CpG_14        | CpG_15        | CpG_16        | CpG_17        | CpG_18        | CpG_19        | CpG_20        | CpG_21        | CpG_22        | CpG_23        | CpG_24        | CpG_25        | CpG_26        | CpG_27        |
|----------------|---|-------------|---------------|---------------|---------------|---------------|---------------|---------------|---------------|---------------|---------------|---------------|---------------|---------------|---------------|---------------|---------------|---------------|---------------|---------------|---------------|---------------|---------------|---------------|---------------|---------------|---------------|---------------|---------------|
| <b>Control</b> | 6 | 250         | 0,52<br>±0,08 | 0,51<br>±0,06 | 0,52<br>±0,06 | 0,49<br>±0,07 | 0,51<br>±0,05 | 0,46<br>±0,12 | 0,53<br>±0,07 | 0,50<br>±0,06 | 0,50<br>±0,09 | 0,03<br>±0,05 | 0,50<br>±0,08 | 0,52<br>±0,05 | 0,51<br>±0,03 | 0,51<br>±0,05 | 0,51<br>±0,07 | 0,49<br>±0,08 | 0,50<br>±0,08 | 0,47<br>±0,05 | 0,52<br>±0,05 | 0,52<br>±0,03 | 0,51<br>±0,07 | 0,48<br>±0,05 | 0,48<br>±0,09 | 0,53<br>±0,05 | 0,61<br>±0,07 | 0,61<br>±0,05 | 0,60<br>±0,05 |
| <b>ART</b>     | 8 | 406         | 0,41<br>±0,05 | 0,42<br>±0,05 | 0,36<br>±0,05 | 0,42<br>±0,06 | 0,42<br>±0,06 | 0,40<br>±0,08 | 0,48<br>±0,05 | 0,47<br>±0,08 | 0,49<br>±0,07 | 0,01<br>±0,02 | 0,48<br>±0,05 | 0,48<br>±0,03 | 0,48<br>±0,05 | 0,45<br>±0,04 | 0,45<br>±0,08 | 0,46<br>±0,04 | 0,47<br>±0,06 | 0,47<br>±0,06 | 0,47<br>±0,05 | 0,44<br>±0,10 | 0,47<br>±0,04 | 0,44<br>±0,06 | 0,43<br>±0,08 | 0,57<br>±0,07 | 0,79<br>±0,05 | 0,64<br>±0,07 | 0,58<br>±0,04 |

## Allele-specific methylation levels in placenta

### patG/matA

| Paternal allele | N | N of clones | CpG_1         | CpG_2         | CpG_3         | CpG_4         | CpG_5         | CpG_6         | CpG_7         | CpG_8         | CpG_9         | CpG_10*       | CpG_11        | CpG_12        | CpG_13        | CpG_14        | CpG_15        | CpG_16        | CpG_17        | CpG_18        | CpG_19        | CpG_20        | CpG_21        | CpG_22        | CpG_23        | CpG_24        | CpG_25        | CpG_26        | CpG_27        |
|-----------------|---|-------------|---------------|---------------|---------------|---------------|---------------|---------------|---------------|---------------|---------------|---------------|---------------|---------------|---------------|---------------|---------------|---------------|---------------|---------------|---------------|---------------|---------------|---------------|---------------|---------------|---------------|---------------|---------------|
| <b>Control</b>  | 6 | 169         | 0,93<br>±0,03 | 0,94<br>±0,05 | 0,90<br>±0,05 | 0,93<br>±0,05 | 0,95<br>±0,04 | 0,93<br>±0,06 | 0,95<br>±0,03 | 0,96<br>±0,03 | 0,92<br>±0,08 | 0,95<br>±0,04 | 0,95<br>±0,04 | 0,96<br>±0,03 | 0,96<br>±0,04 | 0,95<br>±0,05 | 0,97<br>±0,03 | 0,90<br>±0,06 | 0,96<br>±0,05 | 0,93<br>±0,04 | 0,95<br>±0,05 | 0,96<br>±0,03 | 0,95<br>±0,04 | 0,89<br>±0,03 | 0,89<br>±0,03 | 0,93<br>±0,03 | 0,97<br>±0,03 | 0,98<br>±0,03 | 0,91<br>±0,04 |
| <b>ART</b>      | 6 | 128         | 0,90<br>±0,12 | 0,91<br>±0,08 | 0,86<br>±0,09 | 0,93<br>±0,07 | 0,93<br>±0,07 | 0,92<br>±0,09 | 0,92<br>±0,07 | 0,97<br>±0,04 | 0,93<br>±0,14 | 0,92<br>±0,06 | 0,94<br>±0,07 | 0,93<br>±0,06 | 0,93<br>±0,04 | 0,95<br>±0,05 | 0,95<br>±0,05 | 0,88<br>±0,03 | 0,97<br>±0,04 | 0,94<br>±0,04 | 0,98<br>±0,03 | 0,92<br>±0,09 | 0,93<br>±0,05 | 0,88<br>±0,05 | 0,85<br>±0,09 | 0,98<br>±0,02 | 0,98<br>±0,03 | 0,91<br>±0,04 | 0,92<br>±0,07 |

### Maternal allele

| N              | N of clones | CpG_1 | CpG_2         | CpG_3         | CpG_4         | CpG_5         | CpG_6         | CpG_7         | CpG_8         | CpG_9         | CpG_10*       | CpG_11 | CpG_12        | CpG_13        | CpG_14        | CpG_15        | CpG_16        | CpG_17        | CpG_18        | CpG_19        | CpG_20        | CpG_21        | CpG_22        | CpG_23        | CpG_24        | CpG_25        | CpG_26        | CpG_27        |               |
|----------------|-------------|-------|---------------|---------------|---------------|---------------|---------------|---------------|---------------|---------------|---------------|--------|---------------|---------------|---------------|---------------|---------------|---------------|---------------|---------------|---------------|---------------|---------------|---------------|---------------|---------------|---------------|---------------|---------------|
| <b>Control</b> | 6           | 116   | 0,08<br>±0,08 | 0,10<br>±0,10 | 0,10<br>±0,10 | 0,05<br>±0,08 | 0,05<br>±0,08 | 0,06<br>±0,07 | 0,04<br>±0,05 | 0,05<br>±0,05 | 0,03<br>±0,03 |        | 0,05<br>±0,05 | 0,02<br>±0,05 | 0,06<br>±0,06 | 0,05<br>±0,05 | 0,03<br>±0,04 | 0,03<br>±0,04 | 0,04<br>±0,05 | 0,04<br>±0,05 | 0,03<br>±0,04 | 0,03<br>±0,04 | 0,03<br>±0,04 | 0,04<br>±0,05 | 0,04<br>±0,05 | 0,18<br>±0,14 | 0,59<br>±0,15 | 0,53<br>±0,06 | 0,39<br>±0,12 |
| <b>ART</b>     | 6           | 146   | 0,09<br>±0,10 | 0,07<br>±0,07 | 0,07<br>±0,07 | 0,05<br>±0,04 | 0,06<br>±0,04 | 0,04<br>±0,04 | 0,02<br>±0,03 | 0,01<br>±0,01 | 0,01<br>±0,02 |        | 0,01<br>±0,02 | 0,02<br>±0,02 | 0,01<br>±0,02 | 0,02<br>±0,03 | 0,01<br>±0,01 | 0,01<br>±0,02 | 0,01<br>±0,02 | 0,03<br>±0,04 | 0,01<br>±0,01 | 0,01<br>±0,01 | 0,01<br>±0,02 | 0,02<br>±0,03 | 0,02<br>±0,03 | 0,15<br>±0,11 | 0,61<br>±0,13 | 0,47<br>±0,11 | 0,29<br>±0,17 |

### patA/matG

| Paternal allele | N | N of clones | CpG_1         | CpG_2         | CpG_3         | CpG_4         | CpG_5         | CpG_6         | CpG_7         | CpG_8         | CpG_9         | CpG_10* | CpG_11        | CpG_12        | CpG_13        | CpG_14        | CpG_15        | CpG_16        | CpG_17        | CpG_18        | CpG_19        | CpG_20        | CpG_21        | CpG_22        | CpG_23        | CpG_24        | CpG_25        | CpG_26        | CpG_27        |
|-----------------|---|-------------|---------------|---------------|---------------|---------------|---------------|---------------|---------------|---------------|---------------|---------|---------------|---------------|---------------|---------------|---------------|---------------|---------------|---------------|---------------|---------------|---------------|---------------|---------------|---------------|---------------|---------------|---------------|
| <b>Control</b>  | 6 | 42          | 0,94<br>±0,10 | 0,93<br>±0,08 | 0,98<br>±0,04 | 0,93<br>±0,09 | 0,97<br>±0,07 | 0,85<br>±0,17 | 0,98<br>±0,04 | 0,94<br>±0,08 | 0,94<br>±0,11 |         | 0,95<br>±0,08 | 0,98<br>±0,04 | 0,98<br>±0,04 | 0,98<br>±0,04 | 0,97<br>±0,07 | 0,94<br>±0,10 | 0,94<br>±0,10 | 0,89<br>±0,10 | 0,98<br>±0,04 | 1,00<br>±0,00 | 0,97<br>±0,07 | 0,91<br>±0,11 | 0,91<br>±0,11 | 0,97<br>±0,05 | 0,95<br>±0,06 | 0,97<br>±0,07 | 0,89<br>±0,10 |
| <b>ART</b>      | 8 | 84          | 0,75<br>±0,12 | 0,78<br>±0,10 | 0,66<br>±0,13 | 0,78<br>±0,13 | 0,79<br>±0,12 | 0,73<br>±0,19 | 0,94<br>±0,08 | 0,93<br>±0,14 | 0,92<br>±0,13 |         | 0,94<br>±0,08 | 0,92<br>±0,07 | 0,94<br>±0,08 | 0,87<br>±0,05 | 0,88<br>±0,14 | 0,89<br>±0,10 | 0,91<br>±0,10 | 0,91<br>±0,10 | 0,91<br>±0,07 | 0,87<br>±0,18 | 0,91<br>±0,08 | 0,81<br>±0,09 | 0,76<br>±0,17 | 0,78<br>±0,14 | 0,85<br>±0,07 | 0,89<br>±0,06 | 0,81<br>±0,09 |

### Maternal allele

| N              | N of clones | CpG_1 | CpG_2         | CpG_3         | CpG_4         | CpG_5         | CpG_6         | CpG_7         | CpG_8         | CpG_9         | CpG_10*       | CpG_11        | CpG_12        | CpG_13        | CpG_14        | CpG_15         | CpG_16        | CpG_17        | CpG_18        | CpG_19        | CpG_20        | CpG_21        | CpG_22        | CpG_23        | CpG_24        | CpG_25        | CpG_26        | CpG_27        |               |
|----------------|-------------|-------|---------------|---------------|---------------|---------------|---------------|---------------|---------------|---------------|---------------|---------------|---------------|---------------|---------------|----------------|---------------|---------------|---------------|---------------|---------------|---------------|---------------|---------------|---------------|---------------|---------------|---------------|---------------|
| <b>Control</b> | 6           | 208   | 0,09<br>±0,11 | 0,08<br>±0,10 | 0,06<br>±0,10 | 0,06<br>±0,09 | 0,05<br>±0,06 | 0,06<br>±0,12 | 0,06<br>±0,12 | 0,06<br>±0,10 | 0,06<br>±0,11 | 0,06<br>±0,10 | 0,04<br>±0,11 | 0,05<br>±0,08 | 0,03<br>±0,04 | 0,05<br>±0,078 | 0,06<br>±0,10 | 0,05<br>±0,08 | 0,05<br>±0,09 | 0,04<br>±0,07 | 0,05<br>±0,08 | 0,04<br>±0,06 | 0,06<br>±0,11 | 0,06<br>±0,08 | 0,04<br>±0,10 | 0,08<br>±0,07 | 0,27<br>±0,09 | 0,24<br>±0,06 | 0,32<br>±0,05 |
| <b>ART</b>     | 8           | 322   | 0,06<br>±0,06 | 0,06<br>±0,07 | 0,06<br>±0,07 | 0,05<br>±0,05 | 0,05<br>±0,06 | 0,07<br>±0,07 | 0,02<br>±0,04 | 0,02<br>±0,05 | 0,03<br>±0,06 | 0,02<br>±0,04 | 0,03<br>±0,05 | 0,03<br>±0,05 | 0,03<br>±0,06 | 0,03<br>±0,05  | 0,02<br>±0,05 | 0,03<br>±0,05 | 0,02<br>±0,04 | 0,02<br>±0,05 | 0,02<br>±0,05 | 0,02<br>±0,05 | 0,02<br>±0,06 | 0,02<br>±0,06 | 0,02<br>±0,04 | 0,10<br>±0,07 | 0,35<br>±0,12 | 0,39<br>±0,10 | 0,34<br>±0,08 |

\*rs10732516

# Additional file 2: Table S1

**Genotype-specific methylation levels**

**pat A/mat G**

| Total          | N | N of clones | CpG_1        | CpG_2        | CpG_3        | CpG_4        | CpG_5        | CpG_6        | CpG_7        | CpG_8        | CpG_9        | CpG_10*      | CpG_11       | CpG_12       | CpG_13       | CpG_14       | CpG_15       | CpG_16       | CpG_17       | CpG_18       | CpG_19       | CpG_20       | CpG_21       | CpG_22       | CpG_23       | CpG_24       | CpG_25       | CpG_26       | CpG_27       |
|----------------|---|-------------|--------------|--------------|--------------|--------------|--------------|--------------|--------------|--------------|--------------|--------------|--------------|--------------|--------------|--------------|--------------|--------------|--------------|--------------|--------------|--------------|--------------|--------------|--------------|--------------|--------------|--------------|--------------|
| <b>Control</b> | 4 | 286         | 0,37<br>0,08 | 0,41<br>0,05 | 0,41<br>0,05 | 0,42<br>0,02 | 0,40<br>0,06 | 0,40<br>0,05 | 0,48<br>0,03 | 0,47<br>0,02 | 0,45<br>0,05 | 0,00<br>0,00 | 0,47<br>0,04 | 0,46<br>0,04 | 0,49<br>0,02 | 0,49<br>0,02 | 0,49<br>0,02 | 0,46<br>0,03 | 0,46<br>0,03 | 0,48<br>0,03 | 0,44<br>0,02 | 0,49<br>0,02 | 0,48<br>0,02 | 0,44<br>0,02 | 0,43<br>0,02 | 0,47<br>0,07 | 0,04<br>0,04 | 0,07<br>0,04 | 0,07<br>0,06 |
| <b>IVF</b>     | 4 | 281         | 0,45<br>0,02 | 0,48<br>0,04 | 0,46<br>0,05 | 0,47<br>0,04 | 0,48<br>0,03 | 0,48<br>0,07 | 0,50<br>0,00 | 0,49<br>0,02 | 0,50<br>0,01 | 0,00<br>0,00 | 0,50<br>0,00 | 0,48<br>0,02 | 0,47<br>0,03 | 0,50<br>0,00 | 0,49<br>0,02 | 0,46<br>0,03 | 0,46<br>0,04 | 0,49<br>0,02 | 0,48<br>0,02 | 0,47<br>0,03 | 0,47<br>0,04 | 0,45<br>0,06 | 0,47<br>0,03 | 0,50<br>0,03 | 0,57<br>0,03 | 0,73<br>0,03 | 0,75<br>0,08 |

**Allele-specific methylation levels**

**pat A/mat G**

| Paternal allele        | N | N of clones | CpG_1        | CpG_2        | CpG_3        | CpG_4        | CpG_5        | CpG_6        | CpG_7        | CpG_8        | CpG_9        | CpG_10*      | CpG_11       | CpG_12       | CpG_13       | CpG_14       | CpG_15       | CpG_16       | CpG_17       | CpG_18       | CpG_19       | CpG_20       | CpG_21       | CpG_22       | CpG_23       | CpG_24       | CpG_25       | CpG_26       | CpG_27       |
|------------------------|---|-------------|--------------|--------------|--------------|--------------|--------------|--------------|--------------|--------------|--------------|--------------|--------------|--------------|--------------|--------------|--------------|--------------|--------------|--------------|--------------|--------------|--------------|--------------|--------------|--------------|--------------|--------------|--------------|
| <b>Control</b>         | 4 | 54          | 0,71<br>0,15 | 0,78<br>0,10 | 0,78<br>0,10 | 0,80<br>0,03 | 0,76<br>0,10 | 0,77<br>0,10 | 0,95<br>0,04 | 0,94<br>0,04 | 0,90<br>0,11 |              | 0,94<br>0,09 | 0,93<br>0,09 | 0,96<br>0,05 | 0,98<br>0,03 | 0,98<br>0,03 | 0,93<br>0,06 | 0,92<br>0,07 | 0,95<br>0,06 | 0,89<br>0,05 | 0,97<br>0,04 | 0,97<br>0,04 | 0,87<br>0,03 | 0,86<br>0,04 | 0,84<br>0,08 | 0,89<br>0,02 | 0,86<br>0,04 | 0,83<br>0,03 |
| <b>IVF</b>             | 4 | 50          | 0,86<br>0,04 | 0,91<br>0,07 | 0,89<br>0,08 | 0,91<br>0,07 | 0,92<br>0,10 | 0,92<br>0,17 | 1,00<br>0,00 | 0,98<br>0,03 | 1,00<br>0,00 |              | 1,00<br>0,00 | 0,96<br>0,04 | 0,93<br>0,07 | 1,00<br>0,00 | 0,98<br>0,03 | 0,92<br>0,06 | 0,93<br>0,07 | 0,98<br>0,03 | 0,96<br>0,04 | 0,95<br>0,07 | 0,94<br>0,07 | 0,89<br>0,12 | 0,95<br>0,07 | 0,93<br>0,06 | 0,93<br>0,09 | 0,93<br>0,06 | 0,88<br>0,11 |
| <b>Maternal allele</b> | N | N of clones | CpG_1        | CpG_2        | CpG_3        | CpG_4        | CpG_5        | CpG_6        | CpG_7        | CpG_8        | CpG_9        | CpG_10*      | CpG_11       | CpG_12       | CpG_13       | CpG_14       | CpG_15       | CpG_16       | CpG_17       | CpG_18       | CpG_19       | CpG_20       | CpG_21       | CpG_22       | CpG_23       | CpG_24       | CpG_25       | CpG_26       | CpG_27       |
| <b>Control</b>         | 4 | 232         | 0,04<br>0,01 | 0,04<br>0,02 | 0,03<br>0,02 | 0,05<br>0,03 | 0,04<br>0,02 | 0,04<br>0,02 | 0,01<br>0,02 | 0,00<br>0,00 | 0,00<br>0,00 | 0,00<br>0,00 | 0,00<br>0,00 | 0,00<br>0,03 | 0,01<br>0,03 | 0,00<br>0,00 | 0,00<br>0,01 | 0,00<br>0,00 | 0,00<br>0,01 | 0,00<br>0,00 | 0,00<br>0,00 | 0,01<br>0,00 | 0,00<br>0,00 | 0,01<br>0,00 | 0,00<br>0,00 | 0,11<br>0,06 | 0,24<br>0,08 | 0,55<br>0,10 | 0,61<br>0,09 |
| <b>IVF</b>             | 4 | 231         | 0,04<br>0,04 | 0,05<br>0,05 | 0,04<br>0,04 | 0,04<br>0,04 | 0,04<br>0,04 | 0,04<br>0,04 | 0,00<br>0,00 | 0,00<br>0,00 | 0,01<br>0,01 | 0,00<br>0,00 | 0,00<br>0,00 | 0,00<br>0,00 | 0,01<br>0,02 | 0,00<br>0,00 | 0,00<br>0,00 | 0,00<br>0,00 | 0,00<br>0,01 | 0,00<br>0,01 | 0,00<br>0,00 | 0,00<br>0,00 | 0,00<br>0,00 | 0,00<br>0,01 | 0,00<br>0,00 | 0,07<br>0,01 | 0,21<br>0,09 | 0,52<br>0,05 | 0,63<br>0,15 |

\*rs10732516
